# Supplementary material
Source: publisher site journal article supplement (https://www.dovepress.com/article/374299)
Supplement: Supplementary file 1 [file get_supplementary_file.php]

**Supplementary material**

**Table S1:** Code book illustrating themes, categories, and codes settled in the current study in addition to sample of students’ quotes

| **Theme** | **Category** | **Code Label** | **Definition** | **Description** | **Exclusions** | **Example for Students’ Quotes** |
| --- | --- | --- | --- | --- | --- | --- |
| **Advantages** | ***Knowledge and cognition*** | More focus on the details of the subject | Demonstrating paying more attention to detail | Students have ability to focus, and assemble information covering certain learning objective | Students paid attention just to the outline of the subject | *“I had to focus on the details of each question and the distractors presented to discover where the wrong answer is” S9*  *“It kept my attention all the time” S13*  *“More and detailed review of the questions was done with more focus on the details, this led us to greater & deeper understanding” S2*  *“My focus was kept during all the discussion as I wanted to know what the wrong answers were discovered by other teams and why were they wrong” S8* |
| Deep  understanding | Demonstrating the ability to collect parts of acquired information and relate them to a specific context | Students analyze and relate the gained knowledge to reach an agreed assumption | Apparent forms of understanding | *“More and detailed review of the questions was done during inter-group discussion with more focus on the details, this led us to greater and deeper understanding” S25* |
| Longer retention with easier information retrieval | Demonstrating the ability to recall the taught material in an adequate way | Students do less efforts and consume less time to study the topics and to perform required assignments | Students enrolled in extra classes | *“I can remember the lecture more easily after the discussion with the instructor about potential wrong answers of the key” S18* |
| ***Intellectual skills*** | Developed problem-solving skills | Demonstrating the ability to handle difficult or unexpected situations as well as complex challenges. | Students can identify the problem, analyze, and evaluate the situation, search, create solutions, and make decisions | Students copy other teams’ answers for the offered problems | *“I liked that we had a problem in which we did more efforts trying to solve by including a wrong element in the key, this developed our problem-solving skills more as we did more discussions and search to discover the correct answer without being misled by the wrong one” S7* |
| Developed critical thinking skills | Demonstrating the ability to conceptualize, apply, analyze, and/or evaluative information gathered from the experience and use reflection as a guide to belief. | Students can examine elements of thoughts leading to conclusions, implications, and consequences. | Students analyze situations from a superficial direct point of view | *“It increased the analyzing, and I had to use critical thinking to approve or decline the distracters presented and to reach the correct key” S9* |
|  | Better use of higher cognitive functions | Demonstrating ability to use knowledge to analyze, evaluate and apply knowledge on the new situations to reach decisions | Students can analyze, evaluate the problems and apply their knowledge based on their understanding of the core concepts | Exclusive report of low cognitive skills, including improved recall or understanding | *“We analyzed the new case and evaluated the information present in it in a better light of what we learnt deeply during the previous steps” S1*  *“I think I was better in the application of what I learnt in the previous TBL steps on the team evaluation test step” S17* |
| ***General transferrable skills*** | Teamwork | Demonstrating abilities upgrading that allow students to work well with others | Students communicate well with team members, actively listen, resolve conflicts, be responsible, and exchange information to reach an answer | --- | *“I like how my colleagues interact as one team and do brainstorming...” S11*  *“More useful -work as group -discussion, all team members were on one heart trying to overcome the challenge brought by the instructor and discover the wrong answer” S20*  *“We cooperated with each other and listened to each other points of view before agreeing on a decision” S19* |
| Time-management | Demonstrating the ability to finish the task within the assigned time | Students deliver all answers within the assigned time without asking for more time | Copying answers from other teams or not answering due to time shortage | *“We had to answer all questions and discover the wrong answer in a limited time, we managed to complete all the questions in the assigned time by organizing our roles and time assigned for each question discussion” S3*  *“We learned to manage our times to complete the tasks in the assigned time” S22* |
| Leadership | Demonstrating the capabilities that help oversee processes, guide initiatives and steer colleagues toward the achievement of goals. | Students practice leadership in the form of reliability, active listening, patience, dependability, positivity, flexibility, and risk taking that lead their colleagues to achieve their tasks | --- | “*I liked being a leader who managed to organize my team members’ work to reach the answers and discover the wrong answer” S9*  *“I felt proud when I found myself leading my team to success and being able to solve the case” S24* |
| Self-reflection | Demonstrating the ability to practice self-evaluation to see things as what they are | Students evaluate their answers on the light of the discussion to correct their misconceptions or to become more confident with their answers | --- | *“We could evaluate our answers when we got the answer key, we knew our strengths & our weak points of understanding while we were inspecting it with a critical eye” S1*  *“I could evaluate my understanding based on the discussion with the tutor, I discovered parts that I was confused in, and I requested explanation for them to be better in the lesson” S5* |
| ***Values and Attitude*** | More interaction with better engagement | Demonstrating the student-centered criteria of the approach | Students greatly participate in their learning in an active manner | --- | *“I liked how we were very engaged and interactive” S14*  *“We were more interactive in the session defending our arguments against the instructor and engaging with other teams defense for their arguments also, it was fun” S20* |
| Fun and interesting | Demonstrating the feeling of pleasure and entertaining during the session | Students enjoy while learning, not leaving the session or are reluctant to participate. | Losing class management rules | *“It was more fun and an unforgettable experience” S6*  *“It was interesting and amazing…”*  *“We were more interactive in the session defending our arguments against the instructor and engaging with other teams defense for their arguments also, it was fun” S21* |
| Socializing | Demonstrating an energetic, changeable sequence of shared actions between the students that modifies their interaction as per their mates | Students exhibit procedures of social communication including exchange, competition, disagreement, and collaboration | Describing an act of cheating | *“It is more socializing and improved the communication between students”*  *“I like the kinetic activity and I liked the group discussion” S11* |
| Motivating | Attributing the positive actions of students to the inspiring feeling created by experience | Students are stimulated to contribute and play various roles and relate their willing to do to the positive encouraging impressions | Expressing positive feelings not interpreted into an act | *“It is motivating…” S8* |
| More thrilling | Demonstrating the feeling of a wave of keen emotion or excitement | Students describe an excitement sensation related to components of their learning process | Excitement sensation related to other factors in the environment other than the learning process | *“It was a thrill waiting to make sure we were correct in our arguments and that we beat our challenge” S10* |
| Challenging and competitive | Demonstrating the ability to raise and solve problem that needs a solution | Students try to solve puzzles and find the correct/wrong answer before other teams | Describing solving minor tasks that don`t stimulate a sense of having a riddle to solve | *“We felt as if we were in a competition” S24* |
| More confident and self-efficient | Demonstrating the credit of solving the brain stimulating problems | Students report higher sense of one’s value in the learning process, and/or more courageous sensation to take part in faced learning problems | --- | *“I was more confident being able to present our arguments against the instructor’s answers and defend our choices and being correct” S12*  *“I felt proud when I found myself able to solve the case” S24* |
| Not boring | Demonstrating the feeling of interest of learners toward the time they spend in learning | Students perceive the approach as interesting and attractive which keep a sense of attachment during the approach | Losing the class management rules | *“It is interesting, and I didn't feel bored easily” S17* |
| Receiving constructive feedback | The instructor presents thorough detail about students’ performance in the tasks as a team | Students can receive constructive feedbacks during the sessions and are allowed to comment on | Students demanded feedbacks on individual basis | *“I learnt from the instructor`s feedback, it was helpful to improve our learning” S15* |
| **Limitations/ disadvantages** | ***Teamwork dynamics*** | Unresponsive passive team members | Demonstrating the inability of students to play different roles in the team | Students describe passive behavior of some team members towards interacting with them | ~~---~~ | *“Some of the team members were not cooperative, they stayed just as observers to our discussions” S4* |
| Dominant behavior | Demonstrating mastering of students and ignoring them which disturb the team dynamics | Students show strong behavior to control other team members | ~~---~~ | *“I had a team member who was too controlling and states his answers as the correct answer without listening to us” S25* |
| ***Time*** | Limited time | Time assigned to reach the answer is shorter than that needed by students. | Students feel time to solve questions running out before finalizing the allocated task |  | *“Time allocated for the discussion was not enough” S17* |
| ***Effort*** | High effort | Demonstrating use of more mental activity before and/or during the session | Students exert much work in TBL than usual (in other learning context i.e., traditional lecture) |  | *“It needed too much effort” S17* |
| **Recommendations** | ***Teamwork dynamics*** | Intra-team and inter-teams Cooperation and interaction | Demonstrating the action of being more active and helpful to their colleagues in the same team and in other teams | Students favor to show collaboration within their colleagues and to allow interaction with other teams before the tutor is involved in the discussion |  | *“Some team members need to be more interactive; a strategy should be done to push them to have a role in the team in the MCQ & in the cases” S22*  *“I recommend exchanging our results with other team results and discuss them before announcing them in front of all teams and the tutor” S14* |
| Using electronic clickers | Demonstrating the feasibility of using college smart device during TBL | Students could access college smart devices at different phases of TBL | Using personal smart devices | *“It is better to use electronic clickers for the group activity” S23* |
| **Time** | Longer duration | Demonstrating the desire to have more time for the assigned questions | Recommending longer time for the questions than assigned for the GRAT | ~~---~~ | *“I felt we need more time to finish our discussion and select our answers confidently” S22* |
| **Feedback** | Personalized feedback | Demonstrating the need for instructor feedback to a student to appraise and improve himself | The feedback is given on a certain students’ performance | Feedback on group discussions | *“I prefer getting additional feedback for my own responses” S1* |
| **Generalization** | More frequent sessions | Demonstrating the desire for replacing more traditional TBL sessions of the course by the modified TBL. | Students recommend more modified TBL sessions in the current course instead of traditional TBL. | ~~---~~ | *“I recommend repeating this session in other lectures of the course” S13* |
